# Supplementary material
Source: PubMed Central journal article supplement (PMC3838559)
Supplement: supp_mct235_mct235supp_figs.pdf [file supp_mct235_mct235supp_figs.pdf]

# SUPPLEMENTARY DATA

Figure S1. Protein sequence alignment of AtMob1A and AtMob1B proteins.

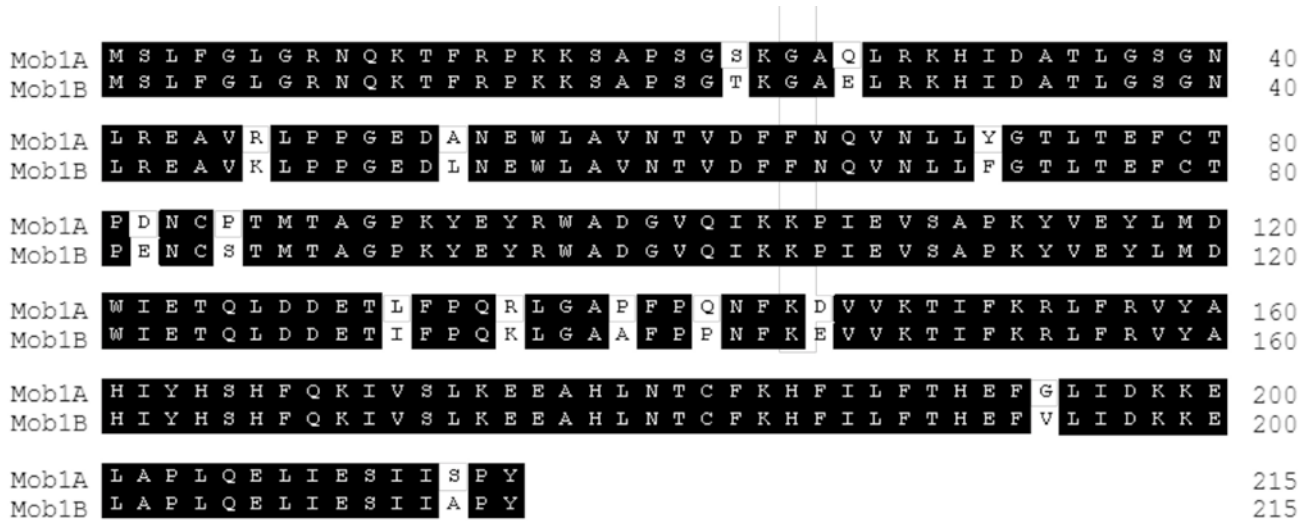

Figure S2: Genevestigator Anatomy expression profile of *Mob1A*.

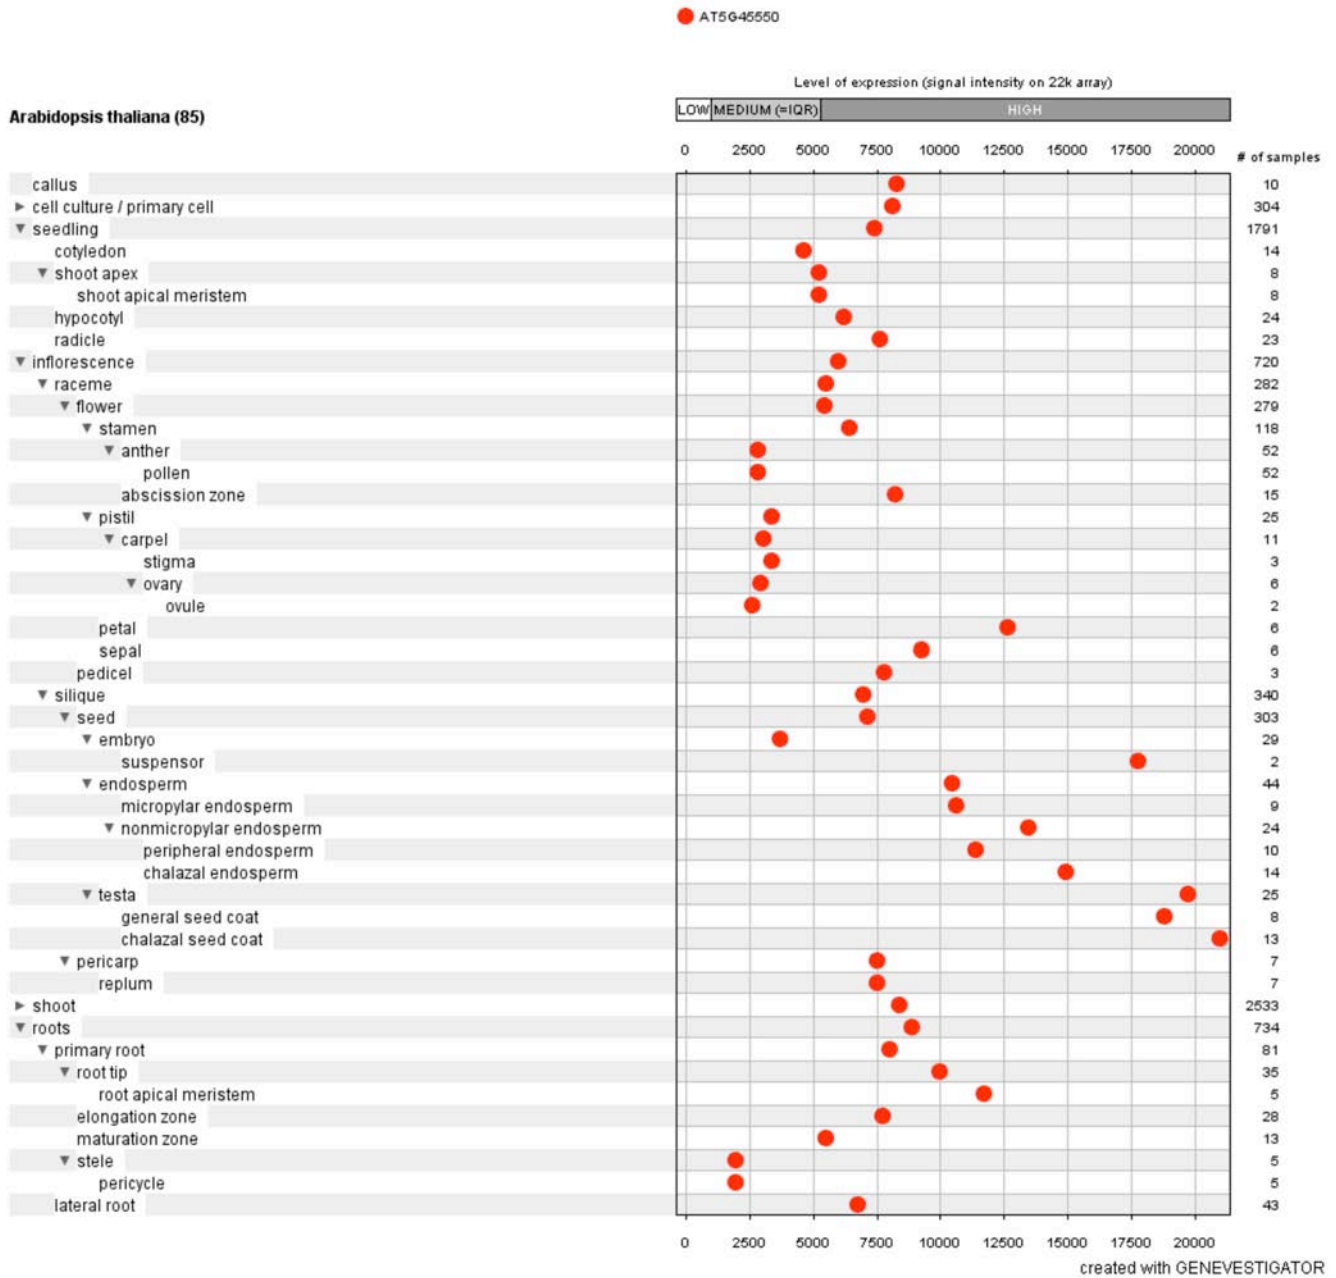

Figure S3. Genevestigator Perturbation expression profile of *Mob1A*.

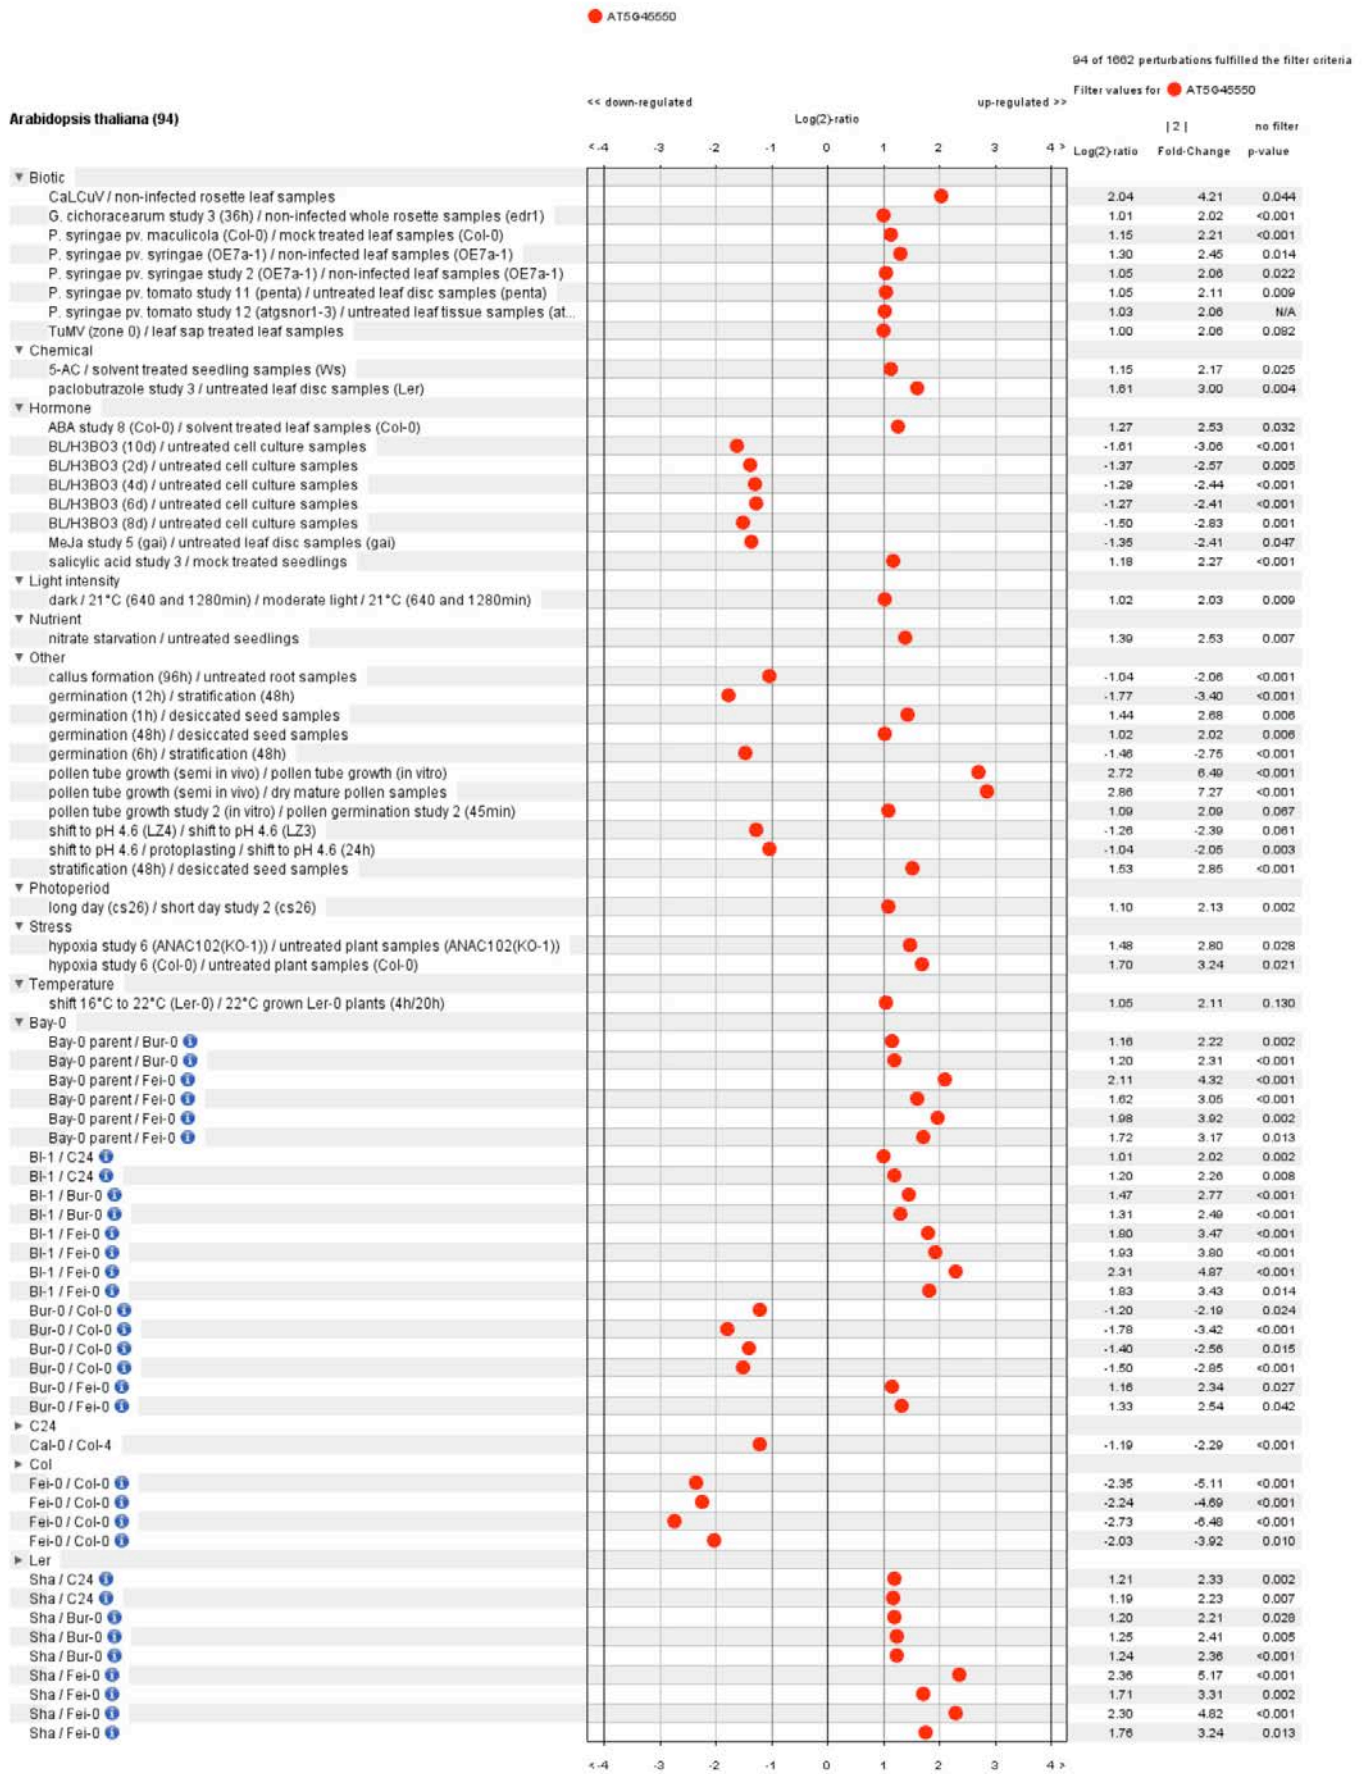

Figure S4. Gene ontology (GO) analysis of 54 genes with highest co-expression to At5g45550 based on 1662 perturbation (Genevestigator: Co-expression tool).

Functional classification using the following parameters: gene ontology = GeneOntology | method = fisher | background = affy | cutoff = 0.05

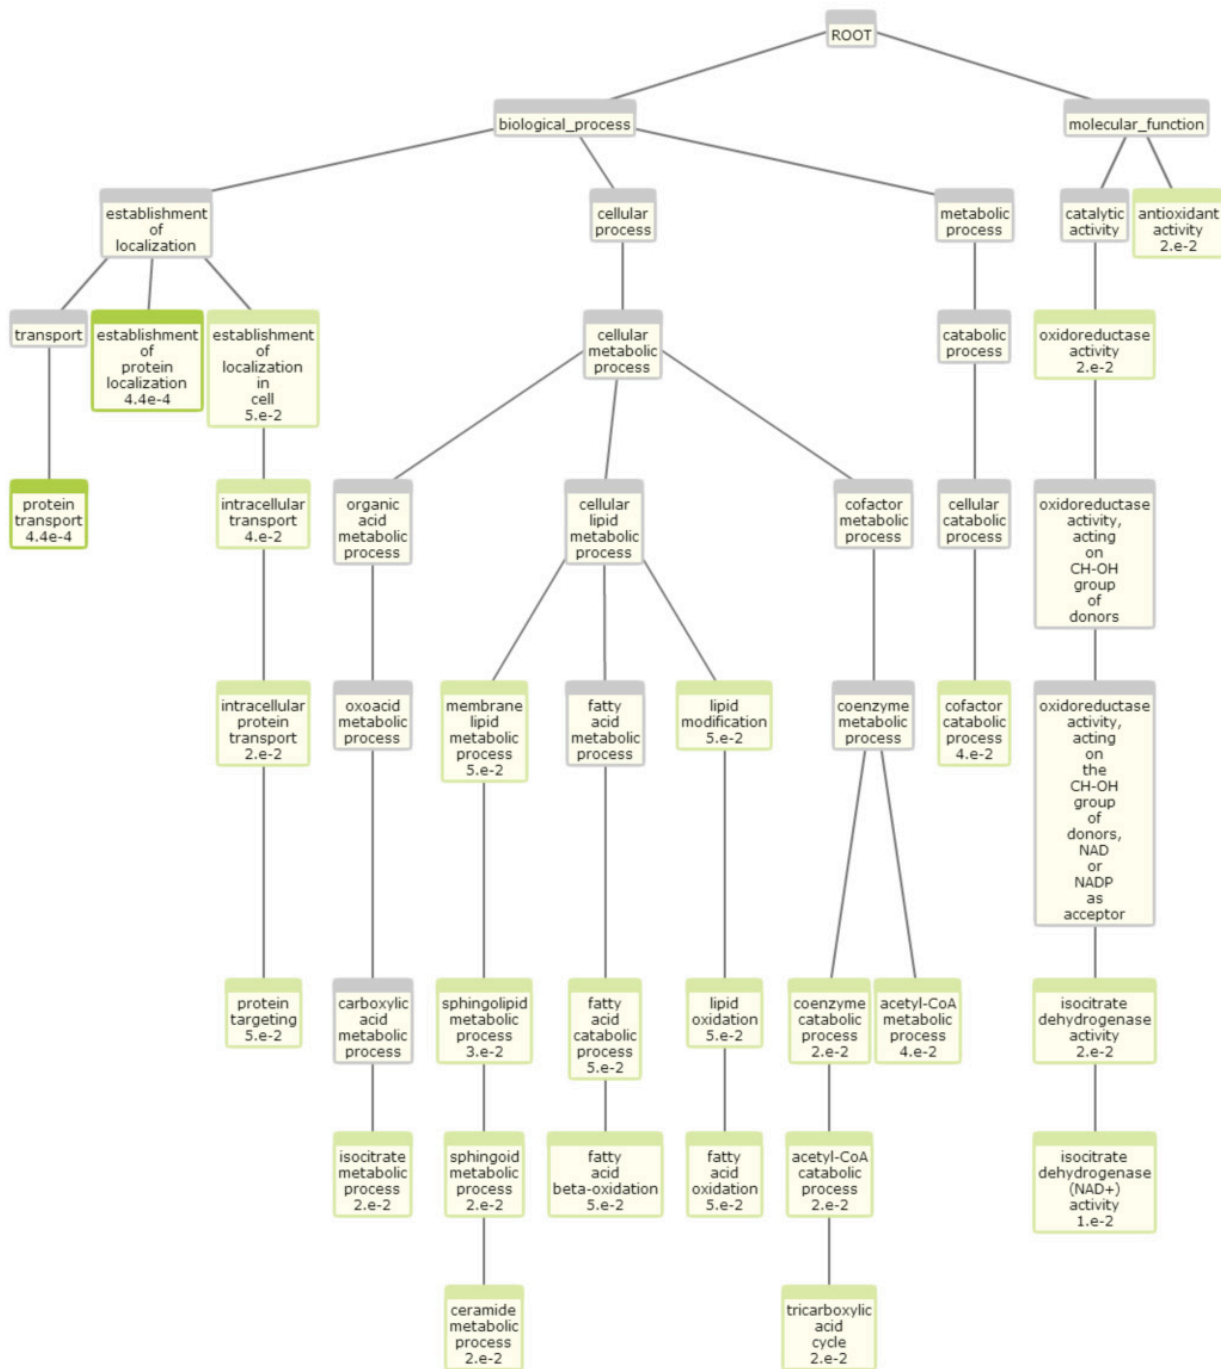

Figure S5. Gene ontology (GO) analysis of 55 genes with highest co-expression to At5g45550 based on 74 anatomical parts (Genevestigator: Co-expression tool).

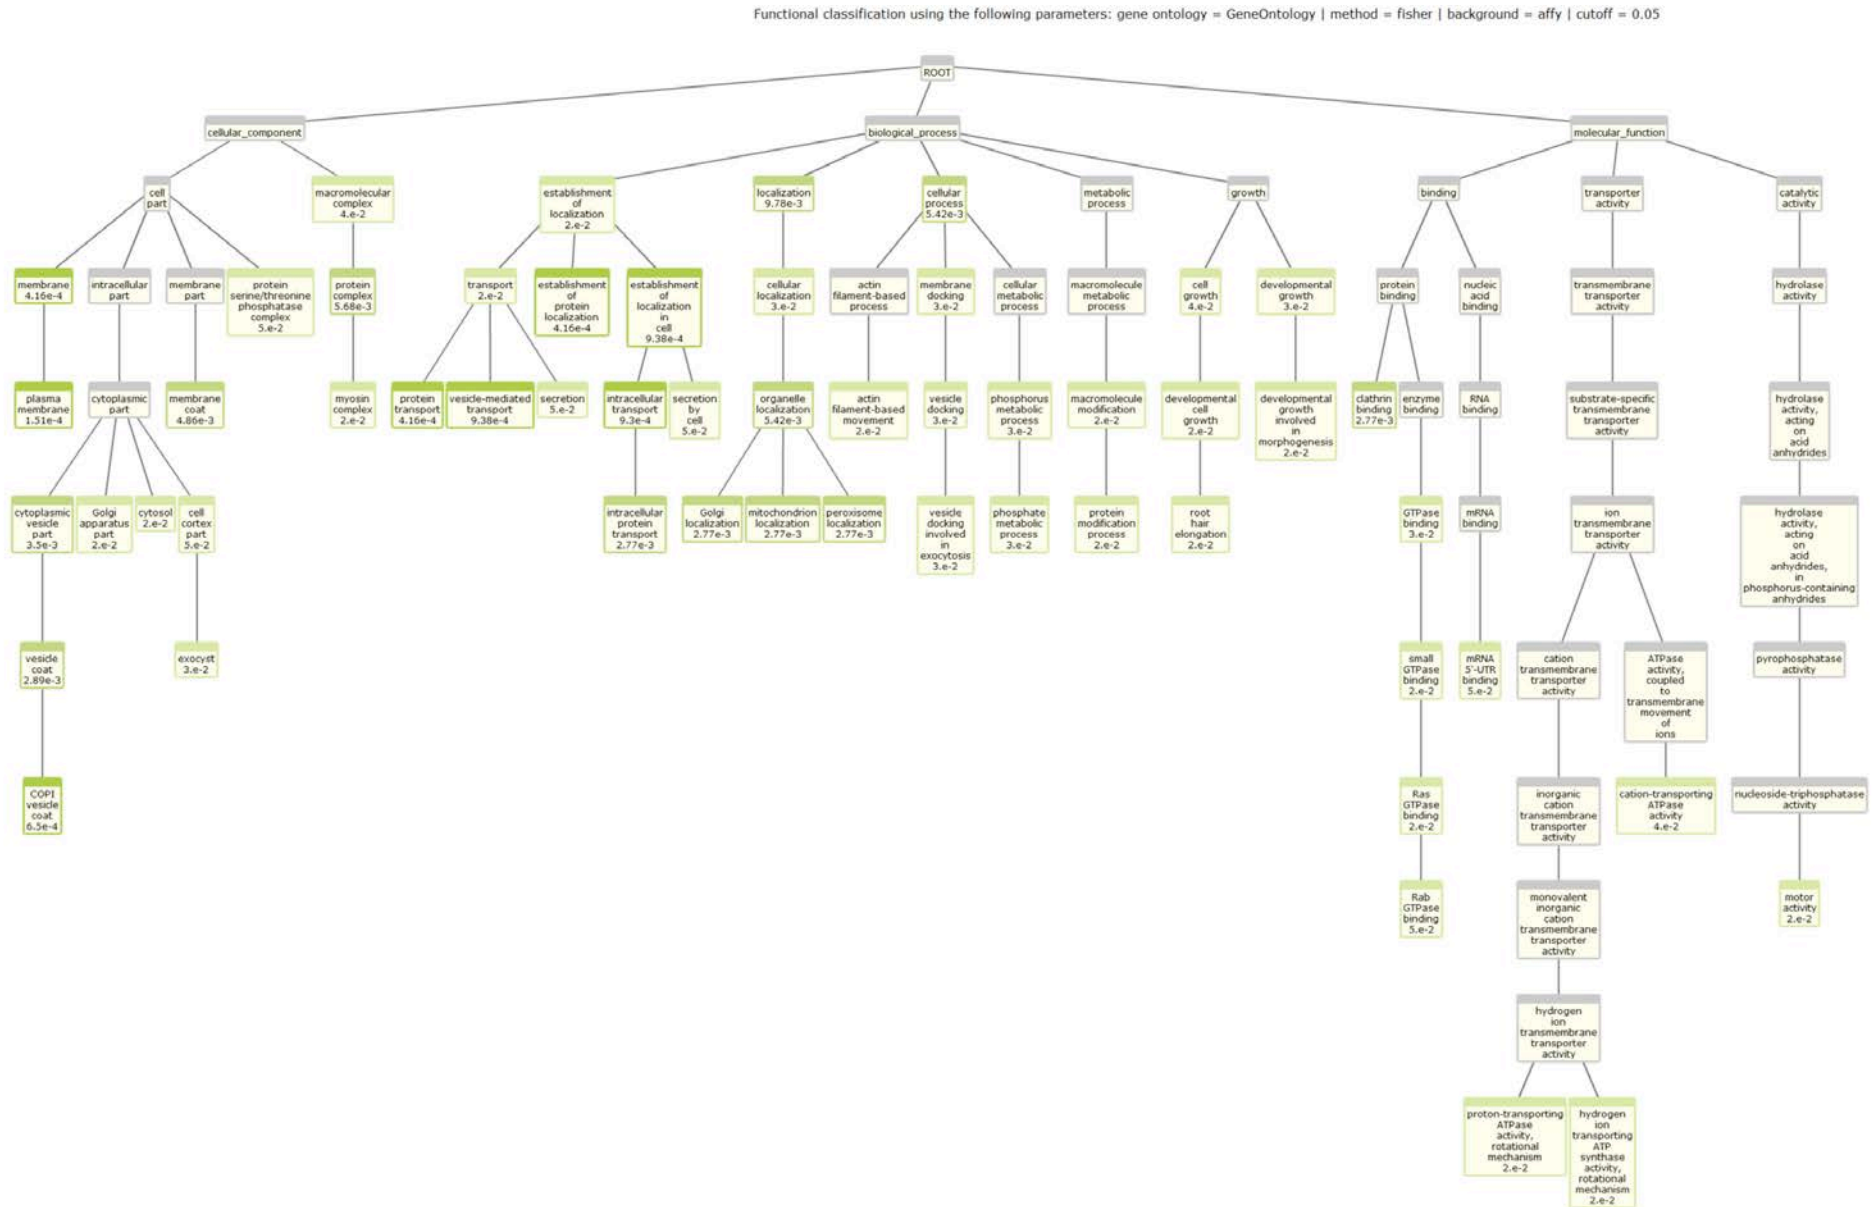

Figure S6. *Mob1A* expression in floral tissues.

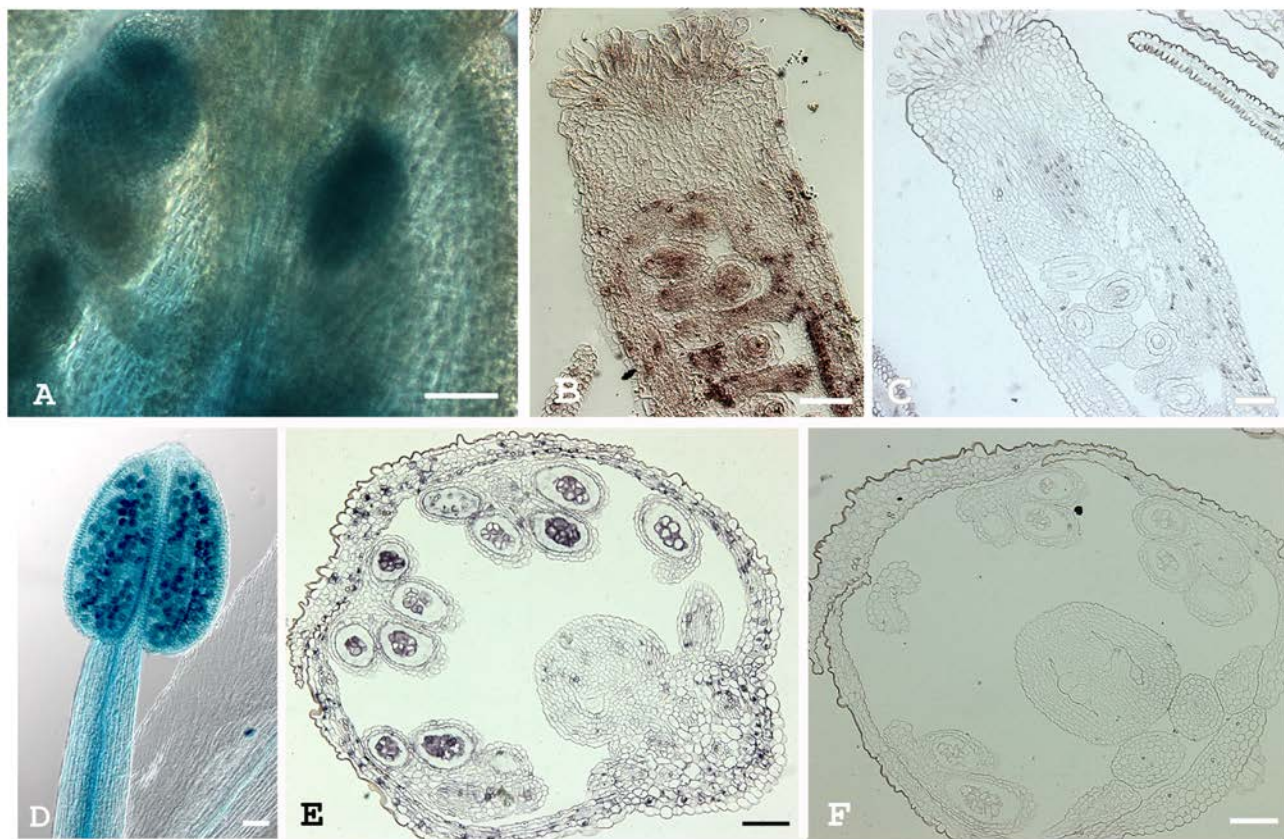

Figure S7. comparison of *Mob1A* and *Mob1B* spatial expression in arabidopsis seedlings.

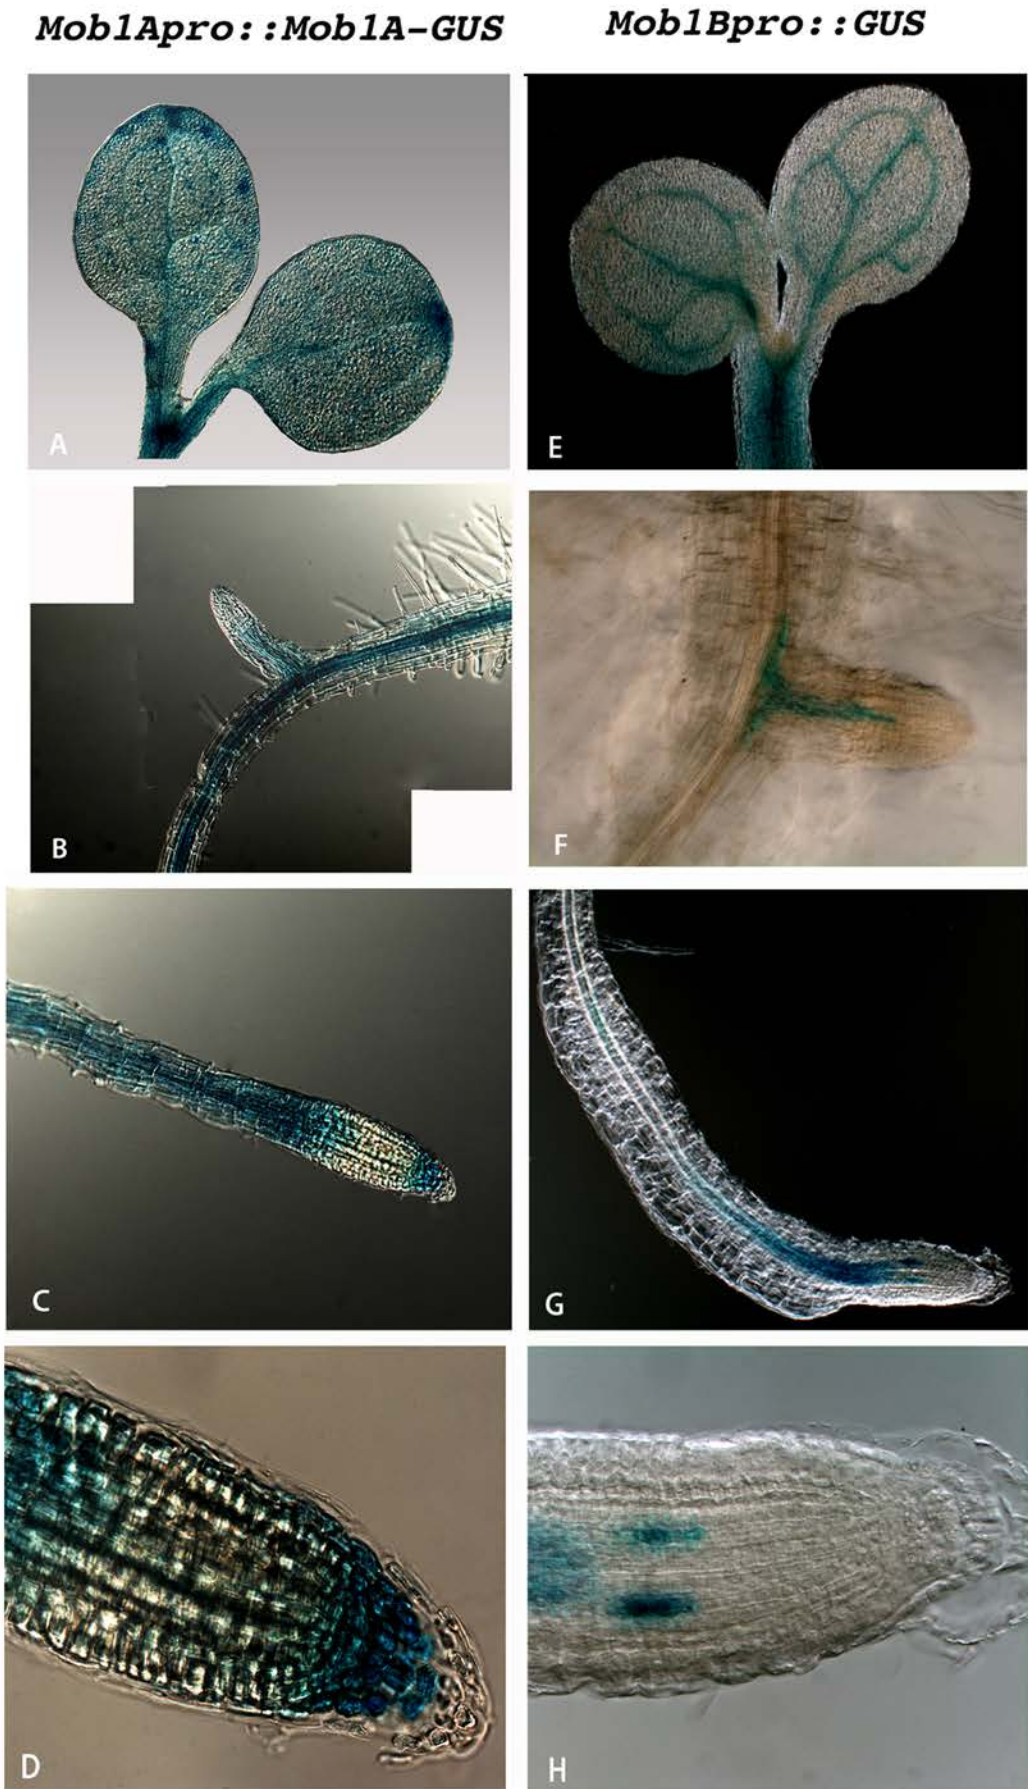

Figure S8. Absence of visible phenotypes for *mob1B-1* plants.

**A**

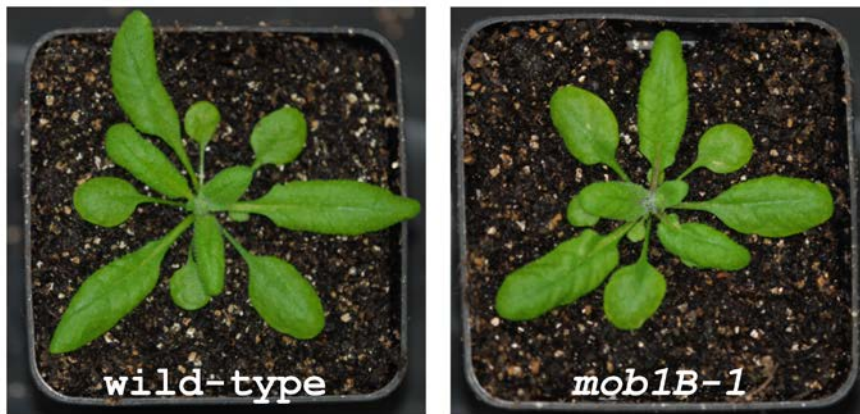

**B**

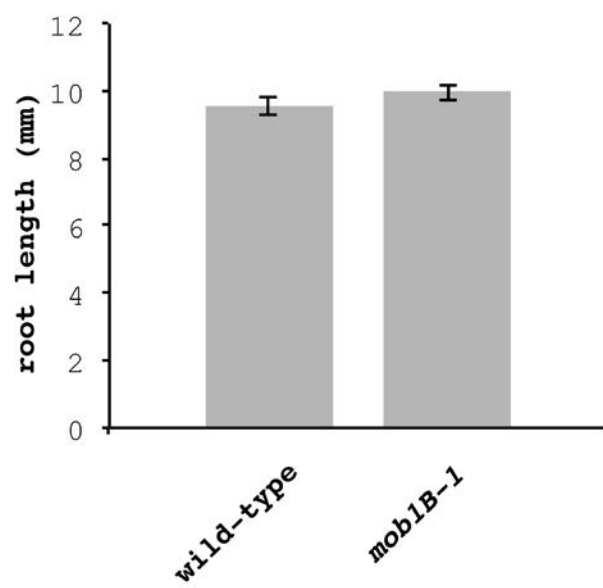



Figure S9. Flowers of wild-type and *mob1A-1* plants.

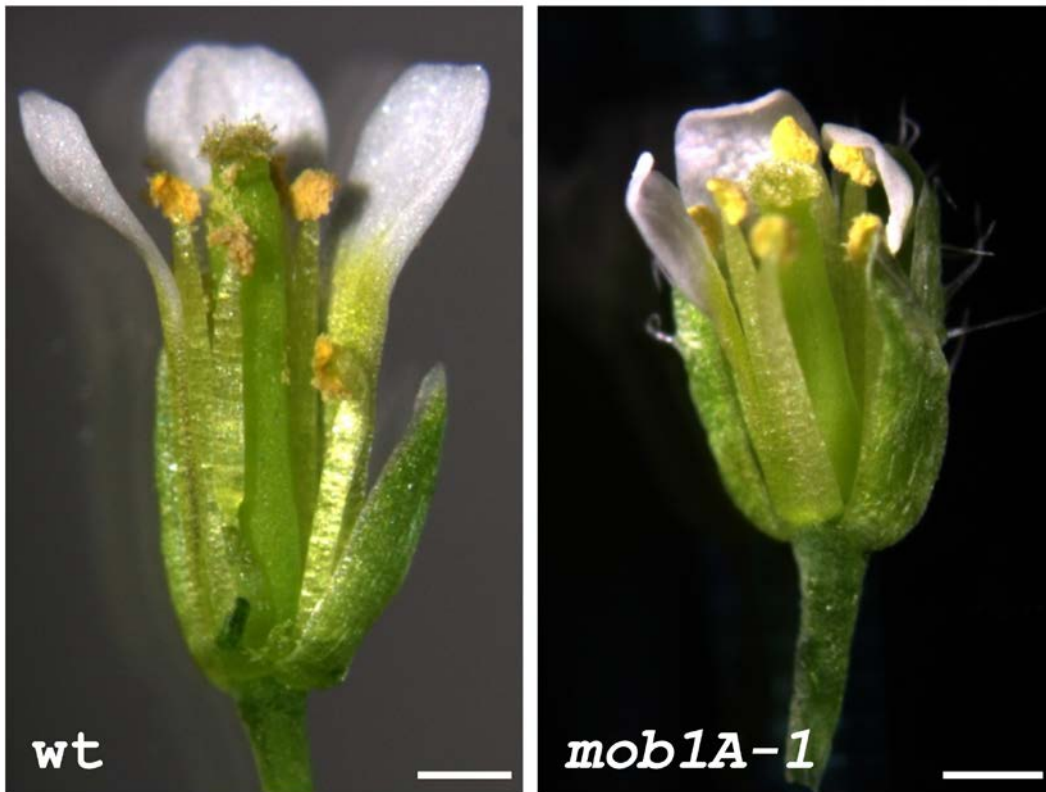

Figure S10. PIN1 and PIN2 immunolocalisation in roots of wild-type and *Mob1A* RNAi plants.

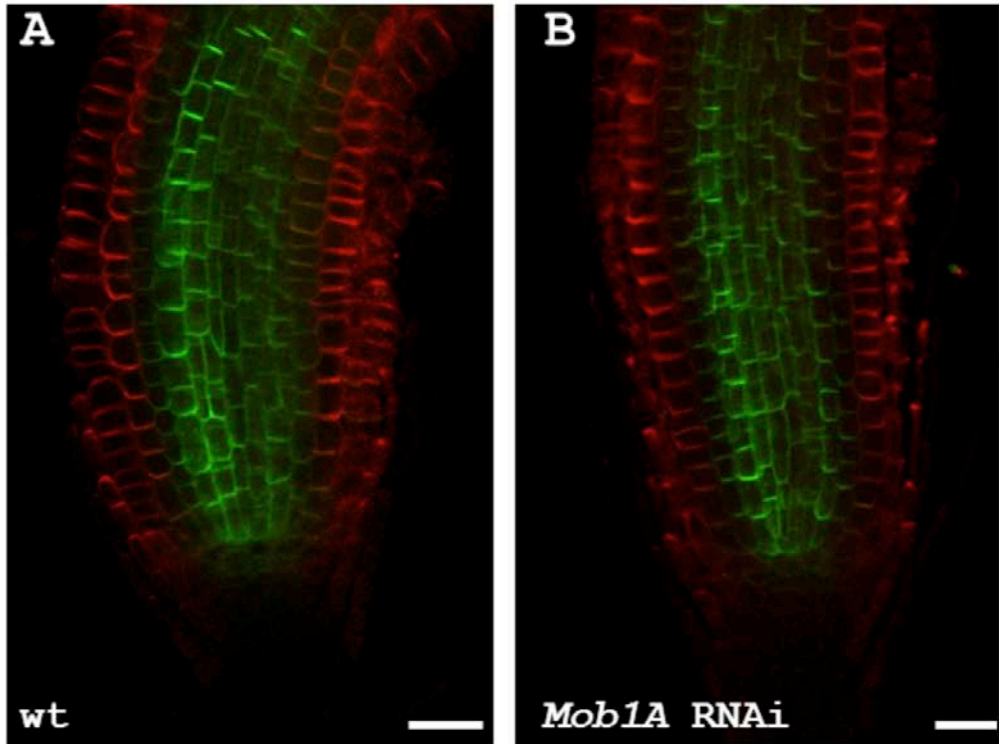

Also available:

Video – confocal microscopy *z*-stack of a *Mob1A* RNAi root tip with double staining of cell borders and starch granules.
