# Supplementary material
Source: PubMed Central journal article supplement (PMC3838559)
Supplement: supp_mct235_mct235supp_table.pdf [file supp_mct235_mct235supp_table.pdf]

## SUPPLEMENTARY DATA

**Table S1. Gene-specific primers used for genotyping and RT-PCR analyses of *Mob1A* and *Mob1B* T-DNA lines.**

### Primers for genotyping

| Gene         | Mutant name    | T-DNA line  | Left primer           | Right primer           |
|--------------|----------------|-------------|-----------------------|------------------------|
| <i>Mob1A</i> | <i>mob1A-1</i> | GK719G04    | TCTGATATTAACCGCAAACGC | AATCAACCATGAACCTGAATCC |
|              | <i>mob1A-2</i> | SALK_076775 | GGATTCGTGTGGCTTTCTTC  | CATTGCAAATGCATAACTGAAA |
| <i>Mob1B</i> | <i>mob1B-1</i> | SALK_062070 | CTAAGAAGAGCGCACCATCAG | TCCTGCAAAACAAAACCAGAC  |

### Primers for RT-PCR analyses

| Gene          | Mutant         | Semi-quantitative PCR primers                         | Quantitative PCR primers                                |
|---------------|----------------|-------------------------------------------------------|---------------------------------------------------------|
| <i>Mob1A</i>  | <i>mob1A-1</i> | For ATGAGTCTCTTTGGGTTAGG                              | For CCCCAATAAATTAACGGTAAGAA                             |
|               | <i>mob1A-2</i> | Rev TCAATAAGGTGAAATGATAGATT                           | Rev TGCTTTTCACATGAACACACAT                              |
| <i>Mob1B</i>  | <i>mob1B-1</i> | For CGTGTCTCACTCCGATAAAGC<br>Rev TGGACAGAGGATTTGGGTTT | For ACCAAACAAAACCCAAATCC<br>Rev TAAAATCCAAGGTTTCAGCAGTG |
| <i>ACTIN7</i> |                | For TGTTCACTACTACCGCAGAA<br>Rev GGTGCAACCACCTTGATCTT  |                                                         |
| <i>ACTIN2</i> |                |                                                       | For GCTCCTCTTAACCCAAAGGC<br>Rev ACACCATCACCAGAATCCAGC   |

**Table S2. List of the 54 genes with the highest co-expression to *Mob1A* (At5g45550) based on 1662 perturbation (Genevestigator: Co-expression tool).**

| Gene number | Description                                                                                                                                                                                                                                                                                                                                                                                                                                                                                        |
|-------------|----------------------------------------------------------------------------------------------------------------------------------------------------------------------------------------------------------------------------------------------------------------------------------------------------------------------------------------------------------------------------------------------------------------------------------------------------------------------------------------------------|
| At1g27000   | Protein of unknown function (DUF1664)                                                                                                                                                                                                                                                                                                                                                                                                                                                              |
| At1g60740   | Thioredoxin superfamily protein                                                                                                                                                                                                                                                                                                                                                                                                                                                                    |
| At2g04900   | unknown protein; FUNCTIONS IN: molecular_function unknown; INVOLVED IN: N-terminal protein myristoylation; LOCATED IN: cellular_component unknown; EXPRESSED IN: 23 plant structures; EXPRESSED DURING: 15 growth stages; CONTAINS InterPro DOMAIN/s: Protein of unknown function DUF423 (InterPro:IPR006696); Has 1824 Blast hits to 1824 proteins in 878 species: Archae - 0; Bacteria - 1498; Metazoa - 118; Fungi - 14; Plants - 58; Viruses - 0; Other Eukaryotes - 136 (source: NCBI BLink). |
| At2g26230   | uricase / urate oxidase / nodulin 35, putative                                                                                                                                                                                                                                                                                                                                                                                                                                                     |
| At1g74290   | alpha/beta-Hydrolases superfamily protein                                                                                                                                                                                                                                                                                                                                                                                                                                                          |
| At5g59840   | Ras-related small GTP-binding family protein                                                                                                                                                                                                                                                                                                                                                                                                                                                       |
| At5g45490   | P-loop containing nucleoside triphosphate hydrolases superfamily protein                                                                                                                                                                                                                                                                                                                                                                                                                           |
| At5g23830   | MD-2-related lipid recognition domain-containing protein                                                                                                                                                                                                                                                                                                                                                                                                                                           |
| At1g21900   | emp24/gp25L/p24 family/GOLD family protein                                                                                                                                                                                                                                                                                                                                                                                                                                                         |
| At3g11780   | MD-2-related lipid recognition domain-containing protein / ML domain-containing protein                                                                                                                                                                                                                                                                                                                                                                                                            |
| At1g09020   | ATSNF4, SNF4, homolog of yeast sucrose nonfermenting 4                                                                                                                                                                                                                                                                                                                                                                                                                                             |
| At1g24350   | Acid phosphatase/vanadium-dependent haloperoxidase-related protein                                                                                                                                                                                                                                                                                                                                                                                                                                 |
| At5g07960   | unknown protein; CONTAINS InterPro DOMAIN/s: Uncharacterised protein family UPF0139 (InterPro:IPR005351); Has 193 Blast hits to 193 proteins in 75 species: Archae - 0; Bacteria - 0; Metazoa - 130; Fungi - 0; Plants - 52; Viruses - 0; Other Eukaryotes - 11 (source: NCBI BLink).                                                                                                                                                                                                              |
| At3g11200   | AL2, alfin-like 2                                                                                                                                                                                                                                                                                                                                                                                                                                                                                  |
| At1g65970   | TPX2, thioredoxin-dependent peroxidase 2                                                                                                                                                                                                                                                                                                                                                                                                                                                           |
| At2g33150   | KAT2, PED1, PKT3, peroxisomal 3-ketoacyl-CoA thiolase 3                                                                                                                                                                                                                                                                                                                                                                                                                                            |
| At4g12590   | Protein of unknown function DUF106, transmembrane                                                                                                                                                                                                                                                                                                                                                                                                                                                  |
| At3g54300   | ATVAMP727, VAMP727, VAMP727, vesicle-associated membrane protein 727                                                                                                                                                                                                                                                                                                                                                                                                                               |
| At4g22330   | ATCES1, Alkaline phytoceramidase (aPHC)                                                                                                                                                                                                                                                                                                                                                                                                                                                            |
| At1g10730   | Clathrin adaptor complexes medium subunit family protein                                                                                                                                                                                                                                                                                                                                                                                                                                           |
| At5g45500   | RNI-like superfamily protein                                                                                                                                                                                                                                                                                                                                                                                                                                                                       |
| At1g80670   | Transducin/WD40 repeat-like superfamily protein                                                                                                                                                                                                                                                                                                                                                                                                                                                    |
| At1g65980   | TPX1, thioredoxin-dependent peroxidase 1                                                                                                                                                                                                                                                                                                                                                                                                                                                           |
| At5g41950   | Tetratricopeptide repeat (TPR)-like superfamily protein                                                                                                                                                                                                                                                                                                                                                                                                                                            |
| At1g49300   | ATRAB7, ATRABG3E, RABG3E, RAB GTPase homolog G3E                                                                                                                                                                                                                                                                                                                                                                                                                                                   |
| At2g43080   | AT-P4H-1, P4H isoform 1                                                                                                                                                                                                                                                                                                                                                                                                                                                                            |
| At3g46440   | UXS5, UDP-XYL synthase 5                                                                                                                                                                                                                                                                                                                                                                                                                                                                           |
| At2g24040   | Low temperature and salt responsive protein family                                                                                                                                                                                                                                                                                                                                                                                                                                                 |
| At1g62790   | Bifunctional inhibitor/lipid-transfer protein/seed storage 2S albumin superfamily protein                                                                                                                                                                                                                                                                                                                                                                                                          |
| At3g11800   | unknown protein; FUNCTIONS IN: molecular_function unknown; INVOLVED IN: biological_process unknown; LOCATED IN: endomembrane system; EXPRESSED IN: 24 plant structures; EXPRESSED                                                                                                                                                                                                                                                                                                                  |

|           |                                                                                                                                                                                                                                                                                                                                                                                                                                                                  |
|-----------|------------------------------------------------------------------------------------------------------------------------------------------------------------------------------------------------------------------------------------------------------------------------------------------------------------------------------------------------------------------------------------------------------------------------------------------------------------------|
|           | DURING: 15 growth stages; BEST Arabidopsis thaliana protein match is: unknown protein (TAIR:AT3G44150.1); Has 74 Blast hits to 73 proteins in 18 species: Archae - 0; Bacteria - 0; Metazoa - 0; Fungi - 0; Plants - 72; Viruses - 0; Other Eukaryotes - 2 (source: NCBI BLink).                                                                                                                                                                                 |
| At5g39950 | ATH2, ATTRX2, ATTRXH2, TRX2, TRXH2, thioredoxin 2                                                                                                                                                                                                                                                                                                                                                                                                                |
| At3g18820 | ATRAB7B, ATRABG3F, RAB71, RAB7B, RAB7B, RABG3F, RAB GTPase homolog G3F                                                                                                                                                                                                                                                                                                                                                                                           |
| At4g40040 | Histone superfamily protein                                                                                                                                                                                                                                                                                                                                                                                                                                      |
| At5g55850 | NOI, RPM1-interacting protein 4 (RIN4) family protein                                                                                                                                                                                                                                                                                                                                                                                                            |
| At5g09890 | Protein kinase family protein                                                                                                                                                                                                                                                                                                                                                                                                                                    |
| At5g25760 | PEX4, UBC21, peroxin4                                                                                                                                                                                                                                                                                                                                                                                                                                            |
| At2g37110 | PLAC8 family protein                                                                                                                                                                                                                                                                                                                                                                                                                                             |
| At5g45550 | Mob1/phocein family protein                                                                                                                                                                                                                                                                                                                                                                                                                                      |
| At4g36750 | Quinone reductase family protein                                                                                                                                                                                                                                                                                                                                                                                                                                 |
| At5g03290 | IDH-V, isocitrate dehydrogenase V                                                                                                                                                                                                                                                                                                                                                                                                                                |
| At4g32680 | unknown protein; BEST Arabidopsis thaliana protein match is: unknown protein (TAIR:AT1G52343.1); Has 30201 Blast hits to 17322 proteins in 780 species: Archae - 12; Bacteria - 1396; Metazoa - 17338; Fungi - 3422; Plants - 5037; Viruses - 0; Other Eukaryotes - 2996 (source: NCBI BLink).                                                                                                                                                                   |
| At2g17130 | IDH-II, IDH2, isocitrate dehydrogenase subunit 2                                                                                                                                                                                                                                                                                                                                                                                                                 |
| At4g23470 | PLAC8 family protein                                                                                                                                                                                                                                                                                                                                                                                                                                             |
| At5g45440 | P-loop containing nucleoside triphosphate hydrolases superfamily protein                                                                                                                                                                                                                                                                                                                                                                                         |
| At1g09560 | GLP5, germin-like protein 5                                                                                                                                                                                                                                                                                                                                                                                                                                      |
| At5g11970 | Protein of unknown function (DUF3511)                                                                                                                                                                                                                                                                                                                                                                                                                            |
| At1g74280 | alpha/beta-Hydrolases superfamily protein                                                                                                                                                                                                                                                                                                                                                                                                                        |
| At1g71190 | SAG18, senescence associated gene 18                                                                                                                                                                                                                                                                                                                                                                                                                             |
| At1g47420 | SDH5, succinate dehydrogenase 5                                                                                                                                                                                                                                                                                                                                                                                                                                  |
| At3g12030 | Protein of unknown function DUF106, transmembrane                                                                                                                                                                                                                                                                                                                                                                                                                |
| At3g02420 | unknown protein; FUNCTIONS IN: molecular_function unknown; INVOLVED IN: biological_process unknown; LOCATED IN: membrane; EXPRESSED IN: 25 plant structures; EXPRESSED DURING: 15 growth stages; CONTAINS InterPro DOMAIN/s: Uncharacterised protein family UPF0121 (InterPro:IPR005344); Has 72 Blast hits to 71 proteins in 25 species: Archae - 0; Bacteria - 0; Metazoa - 2; Fungi - 2; Plants - 60; Viruses - 0; Other Eukaryotes - 8 (source: NCBI BLink). |
| At2g27000 | CYP705A8, cytochrome P450, family 705, subfamily A, polypeptide 8                                                                                                                                                                                                                                                                                                                                                                                                |
| At3g63080 | ATGPX5, GPX5, MEE42, glutathione peroxidase 5                                                                                                                                                                                                                                                                                                                                                                                                                    |
| At4g15470 | Bax inhibitor-1 family protein                                                                                                                                                                                                                                                                                                                                                                                                                                   |

**Table S3. List of the 55 genes with the highest co-expression to *Mob1A* (At5g45550) based on 74 anatomical parts (Genevestigator: Co-expression tool).**

| Gene number | Description                                                                                                                                                                                                                                                                                        |
|-------------|----------------------------------------------------------------------------------------------------------------------------------------------------------------------------------------------------------------------------------------------------------------------------------------------------|
| At1g27000   | Protein of unknown function (DUF1664)                                                                                                                                                                                                                                                              |
| At1g59900   | AT-E1 ALPHA, E1 ALPHA, pyruvate dehydrogenase complex E1 alpha subunit                                                                                                                                                                                                                             |
| At1g64060   | ATRBOH F, ATRBOHF, RBOH F, RBOHAP108, RBOHF, respiratory burst oxidase protein F                                                                                                                                                                                                                   |
| At1g43890   | ATRAB-C1, ATRAB18, ATRABC1, RAB18, RAB18-1, RABC1, RAB GTPASE HOMOLOG B18                                                                                                                                                                                                                          |
| At1g31730   | Adaptin family protein                                                                                                                                                                                                                                                                             |
| At4g23850   | LACS4, AMP-dependent synthetase and ligase family protein                                                                                                                                                                                                                                          |
| At1g76180   | ERD14, Dehydrin family protein                                                                                                                                                                                                                                                                     |
| At5g58430   | ATEXO70B1, EXO70B1, exocyst subunit exo70 family protein B1                                                                                                                                                                                                                                        |
| At4g02350   | SEC15B, exocyst complex component sec15B                                                                                                                                                                                                                                                           |
| At4g24990   | ATGP4, Ubiquitin family protein                                                                                                                                                                                                                                                                    |
| At3g23000   | ATSR2, ATSRPK1, CIPK7, PKS7, SnRK3.10, CBL-interacting protein kinase 7                                                                                                                                                                                                                            |
| At1g08800   | Protein of unknown function, DUF593                                                                                                                                                                                                                                                                |
| At3g24550   | ATPERK1, PERK1, proline extensin-like receptor kinase 1                                                                                                                                                                                                                                            |
| At2g17980   | ATSLY1, Sec1/munc18-like (SM) proteins superfamily                                                                                                                                                                                                                                                 |
| At1g07140   | SIRANBP, Pleckstrin homology (PH) domain superfamily protein                                                                                                                                                                                                                                       |
| At1g52360   | Coatomer, beta' subunit                                                                                                                                                                                                                                                                            |
| At4g12460   | ORP2B, OSBP(oxysterol binding protein)-related protein 2B                                                                                                                                                                                                                                          |
| At5g43900   | ATMYA2, MYA2, XI-2, XI-6, myosin 2                                                                                                                                                                                                                                                                 |
| At1g08720   | ATEDR1, EDR1, Protein kinase superfamily protein                                                                                                                                                                                                                                                   |
| At5g47420   | Tryptophan RNA-binding attenuator protein-like                                                                                                                                                                                                                                                     |
| At5g03040   | iqd2, IQ-domain 2                                                                                                                                                                                                                                                                                  |
| At3g54300   | ATVAMP727, VAMP727, VAMP727, vesicle-associated membrane protein 727                                                                                                                                                                                                                               |
| At4g31490   | Coatomer, beta subunit                                                                                                                                                                                                                                                                             |
| At4g32960   | unknown protein; BEST Arabidopsis thaliana protein match is: unknown protein (TAIR:AT4G32970.1); Has 106 Blast hits to 106 proteins in 39 species: Archae - 0; Bacteria - 0; Metazoa - 62; Fungi - 0; Plants - 37; Viruses - 0; Other Eukaryotes - 7 (source: NCBI BLink).                         |
| At5g20490   | ATXIK, XI-17, XIK, Myosin family protein with Dil domain                                                                                                                                                                                                                                           |
| At2g30440   | TPP, thylakoid processing peptide                                                                                                                                                                                                                                                                  |
| At5g20470   | myosin, putative                                                                                                                                                                                                                                                                                   |
| At4g36780   | BEH2, BES1/BZR1 homolog 2                                                                                                                                                                                                                                                                          |
| At1g74380   | XXT5, xyloglucan xylosyltransferase 5                                                                                                                                                                                                                                                              |
| At2g32080   | PUR ALPHA-1, purin-rich alpha 1                                                                                                                                                                                                                                                                    |
| At4g24290   | MAC/Perforin domain-containing protein                                                                                                                                                                                                                                                             |
| At3g08670   | unknown protein; BEST Arabidopsis thaliana protein match is: unknown protein (TAIR:AT3G51540.1); Has 48380 Blast hits to 29827 proteins in 1356 species: Archae - 46; Bacteria - 5589; Metazoa - 17361; Fungi - 13192; Plants - 2237; Viruses - 905; Other Eukaryotes - 9050 (source: NCBI BLink). |

|           |                                                                                 |
|-----------|---------------------------------------------------------------------------------|
| At1g20260 | ATPase, V1 complex, subunit B protein                                           |
| At1g18890 | ATCDPK1, CDPK1, CPK10, calcium-dependent protein kinase 1                       |
| At1g06870 | Peptidase S24/S26A/S26B/S26C family protein                                     |
| At4g31480 | Coatomer, beta subunit                                                          |
| At4g35830 | ACO1, aconitase 1                                                               |
| At4g01650 | Polyketide cyclase / dehydrase and lipid transport protein                      |
| At3g07100 | ERMO2, SEC24A, Sec23/Sec24 protein transport family protein                     |
| At4g33920 | Protein phosphatase 2C family protein                                           |
| At5g09890 | Protein kinase family protein                                                   |
| At4g14350 | AGC (cAMP-dependent, cGMP-dependent and protein kinase C) kinase family protein |
| At1g30000 | MNS3, alpha-mannosidase 3                                                       |
| At5g53140 | Protein phosphatase 2C family protein                                           |
| At5g45550 | Mob1/phocein family protein                                                     |
| At4g36750 | Quinone reductase family protein                                                |
| At4g30160 | ATVLN4, VLN4, villin 4                                                          |
| At1g76030 | ATPase, V1 complex, subunit B protein                                           |
| At5g23450 | ATLCBK1, LCBK1, long-chain base (LCB) kinase 1                                  |
| At4g23470 | PLAC8 family protein                                                            |
| At1g79340 | AtMC4, MC4, metacaspase 4                                                       |
| At5g11850 | Protein kinase superfamily protein                                              |
| At3g57070 | Glutaredoxin family protein                                                     |
| At5g65910 | BSD domain-containing protein                                                   |
| At5g66060 | 2-oxoglutarate (2OG) and Fe(II)-dependent oxygenase superfamily protein         |
